# Supplementary material
Source: publisher figshare collection journal article supplement (https://asha.figshare.com/articles/dataset/_/23567463)
Supplement: Supplementary file 1 [file 1]

**Supplemental Material S4.** Multiple regression predicting even items sum score as a function of Group B (masked), controlling for study condition.

|                         | Model 1 |        | Model 2 |        | Model 3 |        | Model 4 |        | Model 5 |        |
|-------------------------|---------|--------|---------|--------|---------|--------|---------|--------|---------|--------|
|                         | Est.    | (SE)   |
| Group B (masked)        | 0.29    | (0.85) | −0.33   | (0.66) | −0.33   | (0.66) | −0.15   | (0.65) | −0.27   | (0.69) |
| CELF-5 Sentence Comp.   |         |        | 0.41*** | (0.05) | 0.41*** | (0.05) | 0.35*** | (0.05) | 0.38*** | (0.06) |
| Female                  |         |        |         |        | −0.10   | (0.66) | −0.28   | (0.65) | −0.44   | (0.70) |
| Study 2 Treatment Group |         |        |         |        |         |        | −0.049  | (0.78) | −0.24   | (0.85) |
| Study 1 Treatment Group |         |        |         |        |         |        | 1.99*   | (0.83) | 1.71    | (0.92) |
| Home language not Eng.  |         |        |         |        |         |        |         |        | 0.53    | (0.79) |
| Intercept               | 8.89*** | (0.61) | 9.21*** | (0.47) | 9.36*** | (1.05) | 8.97*** | (1.06) | 9.23*** | (1.20) |
| $R^2$                   | .001    |        | .43     |        | .43     |        | .47     |        | .47     |        |
| $F$                     | .12     |        | 34.29   |        | 22.63   |        | 15.58   |        | 11.59   |        |

*Note.* CELF-5 Sentence Comp. = Clinical Evaluation of Language Fundamentals–Fifth Edition, Sentence Comprehension, and is centered at the sample mean. In this way, the intercept is interpretable as the predicted raw score of a male child in Group A, in the business-as-usual condition of a larger study, with English only at home and an average score on the CELF-5 SC.

\* $p < .05$ . \*\* $p < .01$ . \*\*\* $p < .001$ .
