# Supplementary material
Source: publisher figshare collection journal article supplement (https://asha.figshare.com/articles/dataset/_/23567463)
Supplement: Supplementary file 2 [file 1]

**Supplemental Material S2.** Multiple regression predicting even items sum score as a function of Group B (masked) and Group B by sentence comprehension interaction, as a continuous and a dichotomized variable.

|                           | Even items,<br>controlling for<br>CELF-5 SC<br>continuous |         | Even items,<br>controlling for<br>CELF-5 SC<br>continuous and<br>interacted with<br>group |        | Even items,<br>controlling for<br>CELF-5 SC<br>dichotomized |        | Even items,<br>controlling for<br>CELF-5 SC<br>dichotomized and<br>interacted with<br>group |        |
|---------------------------|-----------------------------------------------------------|---------|-------------------------------------------------------------------------------------------|--------|-------------------------------------------------------------|--------|---------------------------------------------------------------------------------------------|--------|
|                           | Est.                                                      | (SE)    | Est.                                                                                      | (SE)   | Est.                                                        | (SE)   | Est.                                                                                        | (SE)   |
| Group B (masked)          | −0.44                                                     | (0.70)  | −0.42                                                                                     | (0.70) | −0.15                                                       | (0.79) | 0.307                                                                                       | (1.12) |
| Female                    | −0.30                                                     | (0.70)  | −0.32                                                                                     | (0.70) | −0.91                                                       | (0.80) | −0.943                                                                                      | (0.80) |
| Home language not Eng.    | −0.02                                                     | (0.74)  | −0.01                                                                                     | (0.75) | −0.96                                                       | (0.82) | −0.849                                                                                      | (0.84) |
| CELF-5 SC continuous      | 0.42***                                                   | (0.06)  | 0.45***                                                                                   | (0.07) |                                                             |        |                                                                                             |        |
| Group B × SC continuous   |                                                           |         | −0.07                                                                                     | (0.11) |                                                             |        |                                                                                             |        |
| CELF-5 SC dichotomized    |                                                           |         |                                                                                           |        | 3.97***                                                     | (0.82) | 4.487***                                                                                    | (1.22) |
| Group B × SC dichotomized |                                                           |         |                                                                                           |        |                                                             |        | −0.931                                                                                      | (1.62) |
| Intercept                 | 9.83***                                                   | 9.87*** | 9.87***                                                                                   | (1.35) | 9.06***                                                     | (1.34) | 8.818***                                                                                    | (1.41) |
| <i>R</i> <sup>2</sup>     | 0.437                                                     | 0.44    | 0.44                                                                                      |        | 0.273                                                       |        | 0.276                                                                                       |        |
| <i>F</i>                  | 15.92                                                     | 12.72   | 12.72                                                                                     |        | 7.71                                                        |        | 6.18                                                                                        |        |

*Note.* CELF-5 SC Continuous = Clinical Evaluation of Language Fundamentals–Fifth Edition, Sentence Comprehension, and is centered at the sample mean. In this way, the intercept is interpretable as the predicted raw score of a male child in Group A, with English only at home and an average score on the CELF-5 SC. CELF-5 SC dichotomized uses a median split, such that children scoring 19 or higher are coded as 1 ("high") and children scoring 18 or lower are coded as 0 "low."

\**p* < .05. \*\**p* < .01. \*\*\**p* < .001.

Supplemental material, Surrain et al., "Does Assessor Masking Affect Kindergartners' Performance on Oral Language Measures? A COVID-19 Era Experiment With Children From Diverse Home Language Backgrounds," *LSHSS*,  
[https://doi.org/10.1044/2023\\_LSHSS-22-00197](https://doi.org/10.1044/2023_LSHSS-22-00197)
