# Supplementary material
Source: publisher figshare collection journal article supplement (https://asha.figshare.com/articles/dataset/_/23567463)
Supplement: Supplementary file 3 [file 1]

**Supplemental Material S3.** Multiple regression predicting odd items sum score as a function of Group A (masked), controlling for study condition.

|                         | Model 1  |        | Model 2  |        | Model 3  |        | Model 4  |        | Model 5  |        |
|-------------------------|----------|--------|----------|--------|----------|--------|----------|--------|----------|--------|
|                         | Est.     | (SE)   |
| Group A (masked)        | −0.16    | (1.00) | 0.59     | (0.78) | 0.52     | (0.77) | 0.25     | (0.74) | 0.40     | (0.79) |
| CELF-5 Sentence Comp.   |          |        | 0.49***  | (0.06) | 0.48***  | (0.06) | 0.39***  | (0.06) | 0.38***  | (0.07) |
| Female                  |          |        |          |        | −1.54*   | (0.77) | −1.74*   | (0.74) | −1.77*   | (0.79) |
| Study 2 Treatment Group |          |        |          |        |          |        | −1.01    | (0.88) | −0.91    | (0.96) |
| Study 1 Treatment Group |          |        |          |        |          |        | 2.53**   | (0.94) | 1.75     | (1.04) |
| Home language not Eng.  |          |        |          |        |          |        |          |        | −1.39    | (0.90) |
| Intercept               | 10.80*** | (0.70) | 10.44*** | (0.54) | 12.67*** | (1.24) | 12.68*** | (1.22) | 13.63*** | (1.37) |
| $R^2$                   | < .001   |        | .423     |        | .447     |        | .512     |        | .518     |        |
| $F$                     | .0246    |        | 33.72    |        | 24.52    |        | 18.66    |        | 14.34    |        |

*Note.* CELF-5 Sentence Comp. = Clinical Evaluation of Language Fundamentals–Fifth Edition, Sentence Comprehension, and is centered at the sample mean. In this way, the intercept is interpretable as the predicted raw score of a male child in Group B, in the business-as-usual condition of a larger study, with English only at home and an average score on the CELF-5 SC.

\* $p < .05$ . \*\* $p < .01$ . \*\*\* $p < .001$ .
