# Supplementary material
Source: publisher figshare collection journal article supplement (https://asha.figshare.com/articles/dataset/_/23567463)
Supplement: Supplementary file 4 [file 1]

**Supplemental Material S1.** Multiple regression predicting odd items sum score as a function of Group A (masked) and Group A by sentence comprehension interaction, as a continuous and a dichotomized variable.

|                           | Odd items,<br>controlling for<br>CELF-5 SC<br>continuous |        | Odd items,<br>controlling for<br>CELF-5 SC<br>continuous and<br>interacted with<br>group |        | Odd items,<br>controlling for<br>CELF-5 SC<br>dichotomized |        | Odd items,<br>controlling for CELF-<br>5 SC dichotomized<br>and interacted with<br>group |         |
|---------------------------|----------------------------------------------------------|--------|------------------------------------------------------------------------------------------|--------|------------------------------------------------------------|--------|------------------------------------------------------------------------------------------|---------|
|                           | Est                                                      | (SE)   | Est                                                                                      | (SE)   | Est                                                        | (SE)   | Est                                                                                      | (SE)    |
| Group A (masked)          | 0.58                                                     | (0.80) | 0.60                                                                                     | (0.80) | 0.36                                                       | (0.83) | 0.52                                                                                     | (1.18)  |
| Female                    | -1.63*                                                   | (0.80) | -1.61*                                                                                   | (0.80) | -2.33**                                                    | (0.84) | -2.32**                                                                                  | (0.85)  |
| Home language not Eng.    | -2.14*                                                   | (0.85) | -2.15*                                                                                   | (0.85) | -2.86**                                                    | (0.86) | -2.89**                                                                                  | (0.88)  |
| CELF-5 SC continuous      | 0.43***                                                  | (0.07) | 0.47***                                                                                  | (0.07) |                                                            |        |                                                                                          |         |
| Group A × SC continuous   |                                                          |        | -0.07                                                                                    | (0.13) |                                                            |        |                                                                                          |         |
| CELF-5 SC dichotomized    |                                                          |        |                                                                                          |        | 4.93***                                                    | (0.86) | 5.08***                                                                                  | (1.156) |
| Group A × SC dichotomized |                                                          |        |                                                                                          |        |                                                            |        | -0.34                                                                                    | (1.71)  |
| Intercept                 | 13.95***                                                 | (1.34) | 13.95***                                                                                 | (1.34) | 13.00***                                                   | (1.45) | 12.92***                                                                                 | (1.51)  |
| $R^2$                     | 0.488                                                    |        | 0.488                                                                                    |        | 0.442                                                      |        | 0.442                                                                                    |         |
| $F$                       | 19.54                                                    |        | 19.54                                                                                    |        | 16.22                                                      |        | 12.83                                                                                    |         |

*Note.* CELF-5 SC Continuous = Clinical Evaluation of Language Fundamentals–Fifth Edition, Sentence Comprehension, and is centered at the sample mean. In this way, the intercept is interpretable as the predicted raw score of a male child in Group B, with English only at home and an average score on the CELF-5 SC. CELF-5 SC dichotomized uses a median split, such that children scoring 19 or higher are coded as 1 ("high") and children scoring 18 or lower are coded as 0 "low."

\* $p < .05$ . \*\* $p < .01$ . \*\*\* $p < .001$ .
