# Supplementary material
Source: publisher figshare collection journal article supplement (https://asha.figshare.com/articles/dataset/_/23567463)
Supplement: Supplementary file 5 [file 1]

**Supplemental Material S5.** Testing interactions between group and home language, controlling for study condition.

|                         | Odd Items |        | Odd Items |        | Even Items |        | Even Items |        |
|-------------------------|-----------|--------|-----------|--------|------------|--------|------------|--------|
|                         | Est.      | (SE)   | Est.      | (SE)   | Est.       | (SE)   | Est        | (SE)   |
| Group (masked)          | 0.40      | (0.79) | −0.65     | (1.09) | −0.27      | (0.69) | 0.03       | (0.97) |
| CELF-5 Sentence Comp.   | 0.38***   | (0.07) | 0.40***   | (0.07) | 0.38***    | (0.06) | 0.39***    | (0.06) |
| Female                  | −1.77*    | (0.79) | −1.57     | (0.80) | −0.44      | (0.70) | −0.38      | (0.71) |
| Study 2 Treatment Group | −0.91     | (0.96) | −1.25     | (0.99) | −0.24      | (0.85) | −0.34      | (0.88) |
| Study 1 Treatment Group | 1.75      | (1.04) | 1.47      | (1.06) | 1.71       | (0.92) | 1.63       | (0.94) |
| Home language not Eng.  | −1.39     | (0.90) | −2.42*    | (1.16) | 0.53       | (0.79) | 0.89       | (1.13) |
| Group × HL              |           |        | 2.27      | (1.64) |            |        | −0.66      | (1.46) |
| Intercept               | 13.63***  | (1.37) | 14.00***  | (1.39) | 9.23***    | (1.20) | 9.036***   | (1.28) |
| $R^2$                   | .518      |        | 0.53      |        | 0.465      |        | 0.466      |        |
| $F$                     | 14.34     |        | 12.71     |        | 11.59      |        | 9.868      |        |

*Note.* Group is coded as A = 1 for models predicting odd items and B = 1 for the models predicting even items, so that for both sets of models the estimates on group are for the masked condition and the reference category is the unmasked condition.

\* $p < .05$ . \*\* $p < .01$ . \*\*\* $p < .001$ .
